# Supplementary material for: Inflamm-Aging-Related Cytokines of IL-17 and IFN-γ Accelerate Osteoclastogenesis and Periodontal Destruction
Source: J Immunol Res. 2021 Aug 4;2021:9919024. doi: 10.1155/2021/9919024 (PMC8357511; doi:10.1155/2021/9919024)
Supplement: Supplementary Materials — Figure S1: the number of TRAP-positive osteoclasts (A) and the area of TRAP-positive osteoclasts (B) were counted and presented (mean ± standard deviation, n = 3). #p < 0.05 compared with the control group; &p < 0.05 compared with the IL-17+IFN-γ group. Figure S2: in condition 2, BMMs were cultured with M-CSF (30 ng/ml) for 3 days, and on day 3, 20 ng/ml RANKL together with IL-17 (1 ng/ml) or/and IFN-γ (0.2 ng/ml) was added for 5 days. The number of TRAP-positive osteoclasts (A) and the area of TRAP-positive osteoclasts (B) were counted and presented (mean ± standard deviation, n = 3). #p < 0.05 compared with the control group; &p < 0.05 compared with the IL-17+IFN-γ group. Figure S3: effects of IL-17 (0.1, 10 ng/ml) or/and IFN-γ (0.02, 2 ng/ml) on the expression of osteoclastogenic genes in vitro. The mRNA expression of osteoclast-related genes (A) c-Fos, (B) NFATc1, (C) Ctsk, (D) MMP-9, and (E) TRAP was detected with different concentrations of IL-17 or/and IFN-γ using RT-qPCR. Data were standardized to GAPDH expression and shown as a fold change relative to the control group (mean ± standard deviation, n = 3). #p < 0.05 compared with the control group; &p < 0.05 compared with the IL-17+IFN-γ group. Table S1: primers used for RT-qPCR. [file 9919024.f1.zip]

Archive with 4 entries (4 files):
- R-FigureS1.ai
- R-FigureS2.ai
- R-FigureS3.ai
- Table S1.docx
